# Supplementary material for: CRIPTO and miR-371a-3p Are Serum Biomarkers of Testicular Germ Cell Tumors and Are Detected in Seminal Plasma from Azoospermic Males
Source: MDPI journal article supplement (doi:10.3390/cancers12030760), 2020-03-23
Supplement: s1 [file s1]

Article

# CRIPTO and miR-371a-3p Are Serum Biomarkers of Testicular Germ Cell Tumors and Are Detected in Seminal Plasma from Azoospermic Males

Cassy M. Spiller, João Lobo, Willem P. A. Boellaard, Ad J. M. Gillis, Josephine Bowles, and Leendert H. J. Looijenga

## Supplementary Materials

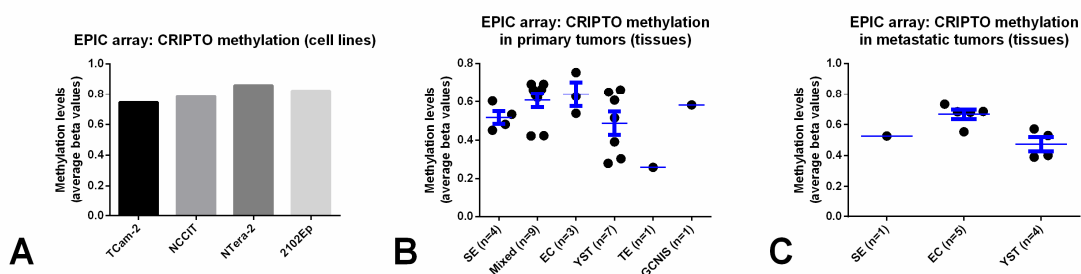

**Figure S1.** Methylation levels for CRIPTO promoter derived from EPIC array analyses on cell lines (A), primary tumor tissues (B) and metastatic tumor tissues (C). Average beta values are plotted. Abbreviations: EC – embryonal carcinoma; GCNIS – germ cell neoplasia in situ; SE – seminoma; TE – teratoma; YST – yolk sac tumor.

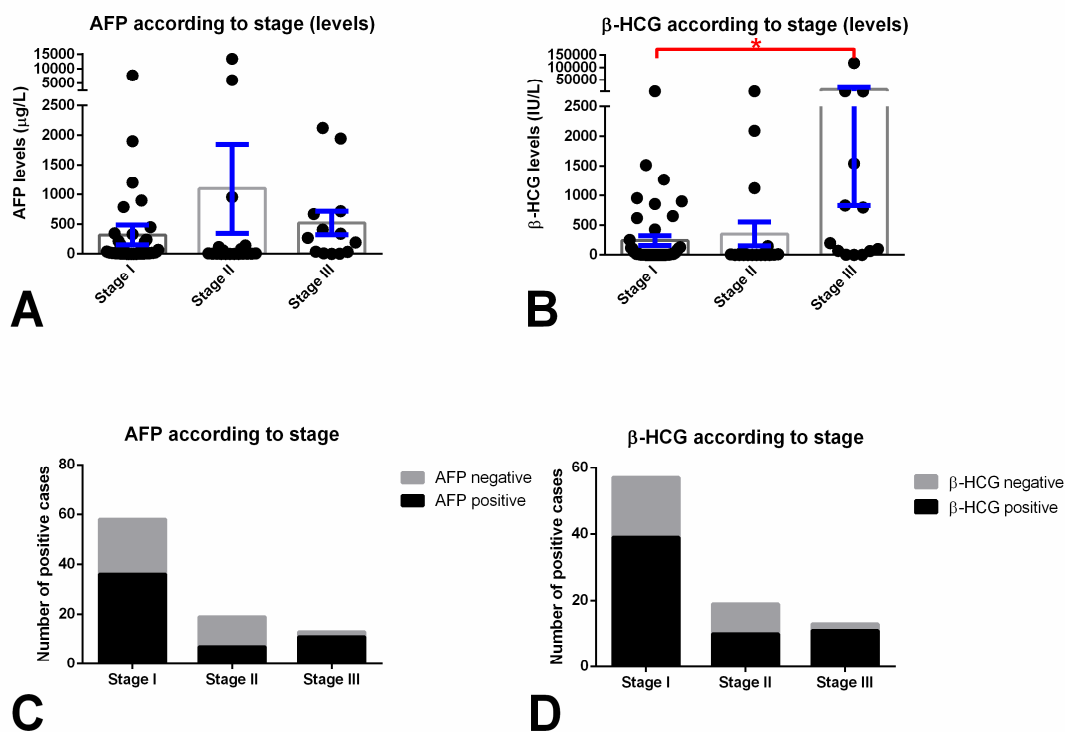

**Figure 2.** AFP (A and C) and  $\beta$ -HCG (B and D) levels according to disease stage. Levels of AFP and  $\beta$ -HCG according to disease stage (A and B; error bars represent  $\pm$ S.E.M); number of positive cases according to disease stage (C and D). Abbreviations: AFP – alpha fetoprotein;  $\beta$ -HCG – human chorionic gonadotropin subunit beta.

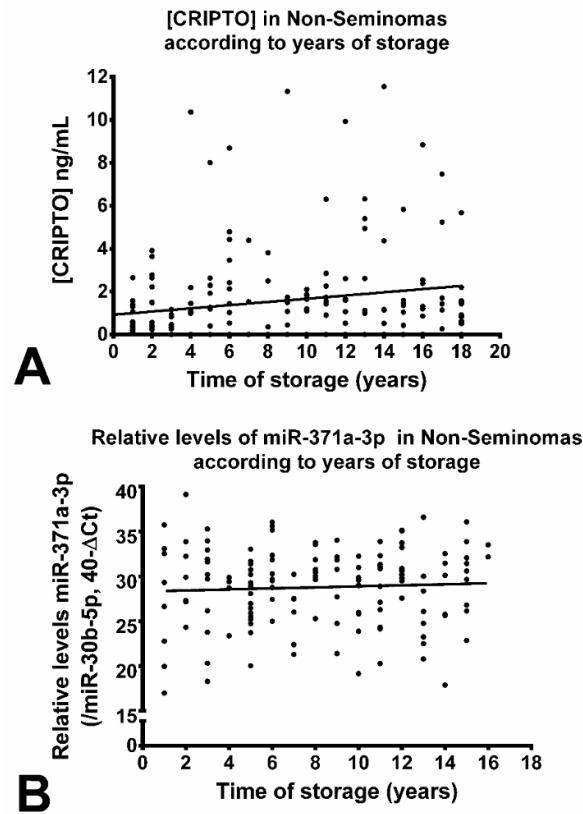

**Figure 3.** Correlation between years of sample storage and A) CRIPTO concentration and B) miR-371a-3p relative levels in the non-seminoma serum cohort. Relative levels of miR-371a-3p were normalized with miR-30b-5p and plotted in  $40-\Delta\text{Ct}$  format.

**Table S1.** CRIPTO concentration analyses presented in Table 2, with outlier value in the control group removed.

| All Sample Types   | <i>p</i> -value* |
|--------------------|------------------|
| Control            | -                |
| Seminoma           | 0.2700           |
| Non-Seminoma       | 0.0042           |
| GCNIS              | 0.5157           |
| Non-Seminomas Only | <i>p</i> -value* |
| Control            | -                |
| Mixed              | 0.0045           |
| EC                 | 0.0022           |
| YST                | 0.4397           |
| TE                 | 0.4288           |
| Mixed Tumors Only  | <i>p</i> -value* |
| Control            | -                |
| Mixed, EC-positive | 0.0043           |
| Mixed, EC-negative | 0.0390           |

\* *p*-values refer to the comparison between the individual patient groups and controls. Abbreviations: EC – embryonal carcinoma; GCNIS – germ cell neoplasia *in situ*; TE – teratoma; YST – yolk sac tumor.
